# Supplementary material for: A Novel Strategy for Mixed Jam Evaluation: Apparent Indicator, Sensory, Metabolomic, and GC-IMS Analysis
Source: MDPI journal article supplement (doi:10.3390/foods13071104), 2024-04-03
Supplement: s1 [file s1]

**Table S1.** Differential polyphenol metabolites down-regulated in the comparison of day 0 and day 10 jam samples.

| NO. | Metabolite               | Formula                                         | Class I    | CAS ID   |
|-----|--------------------------|-------------------------------------------------|------------|----------|
| 1   | Epigallocatechin gallate | C <sub>22</sub> H <sub>18</sub> O <sub>11</sub> | Flavonoids | 989-51-5 |
