# Supplementary material for: A Novel Strategy for Mixed Jam Evaluation: Apparent Indicator, Sensory, Metabolomic, and GC-IMS Analysis
Source: MDPI journal article supplement (doi:10.3390/foods13071104), 2024-04-03
Supplement: s1 [file s1]

**Table S3.** Differential polyphenol metabolites down-regulated in the comparison of day 0 and day 25 jam samples.

| NO. | Metabolite                                     | Formula                                          | Class I                           | CAS ID                    |
|-----|------------------------------------------------|--------------------------------------------------|-----------------------------------|---------------------------|
| 1   | Cubebinone                                     | C <sub>23</sub> H <sub>26</sub> O <sub>8</sub>   | Lignans and derivatives           | 101751-71-7               |
| 2   | 2'-Hydroxygenistein<br>7-(6"-malonylglucoside) | C <sub>24</sub> H <sub>22</sub> O <sub>14</sub>  | Flavonoids                        | 137351-13-4               |
| 3   | Epigallocatechin gallate                       | C <sub>22</sub> H <sub>18</sub> O <sub>11</sub>  | Flavonoids                        | 989-51-5                  |
| 4   | Catechin 3'-glucuronide                        | C <sub>21</sub> H <sub>22</sub> O <sub>12</sub>  | Flavonoids                        | 853728-25-3               |
| 5   | Quercetin 3-glucoside 7-xyloside               | C <sub>26</sub> H <sub>28</sub> O <sub>16</sub>  | Flavonoids                        | 79592-61-3                |
| 6   | Feruloyl C1-glucuronide                        | C <sub>16</sub> H <sub>18</sub> O <sub>10</sub>  | Phenolic acids and<br>derivatives | -                         |
| 7   | Kaempferol-3-O-Arabinofuranoside               | C <sub>20</sub> H <sub>18</sub> O <sub>10</sub>  | Flavonoids                        | -                         |
| 8   | Limocitrin 3-rhamnoside                        | C <sub>23</sub> H <sub>24</sub> O <sub>12</sub>  | Flavonoids                        | 90456-56-7                |
| 9   | (+)-taxifolin                                  | C <sub>15</sub> H <sub>12</sub> O <sub>7</sub>   | Flavonoids                        | 480-18-2                  |
| 10  | Neocarthamin                                   | C <sub>21</sub> H <sub>22</sub> O <sub>11</sub>  | Flavonoids                        | -                         |
| 11  | Cichoriin                                      | C <sub>15</sub> H <sub>16</sub> O <sub>9</sub>   | Coumarins and<br>derivatives      | 531-58-8                  |
| 12  | Serotonin                                      | C <sub>10</sub> H <sub>12</sub> N <sub>2</sub> O | Indoles and derivatives           | 50-67-9                   |
| 13  | 2,4',5,7-Tetrahydroxyflavanone                 | C <sub>15</sub> H <sub>12</sub> O <sub>6</sub>   | Flavonoids                        | 58124-18-8                |
| 14  | Daidzein 7-O-glucuronide                       | C <sub>21</sub> H <sub>18</sub> O <sub>10</sub>  | Flavonoids                        | -                         |
| 15  | Conidendrin                                    | C <sub>20</sub> H <sub>20</sub> O <sub>6</sub>   | Lignans and derivatives           | 518-55-8                  |
| 16  | Isovitexin 2"-O-glucoside                      | C <sub>27</sub> H <sub>30</sub> O <sub>15</sub>  | Flavonoids                        | 60767-80-8                |
| 17  | Diospyrin                                      | C <sub>21</sub> H <sub>24</sub> O <sub>13</sub>  | Flavonoids                        | 27838-81-9;2<br>8164-57-0 |
| 18  | Isoeriocitrin                                  | C <sub>27</sub> H <sub>32</sub> O <sub>15</sub>  | Flavonoids                        | -                         |
| 19  | Astilbin                                       | C <sub>21</sub> H <sub>22</sub> O <sub>11</sub>  | Flavonoids                        | 29838-67-3                |
| 20  | Kuwanon Z                                      | C <sub>34</sub> H <sub>26</sub> O <sub>10</sub>  | Flavonoids                        | 104931-21-7               |
| 21  | Luteoforol                                     | C <sub>15</sub> H <sub>14</sub> O <sub>6</sub>   | Flavonoids                        | 24897-98-1                |
| 22  | 2'-O-Methylisiquiritigenin                     | C <sub>16</sub> H <sub>14</sub> O <sub>4</sub>   | Flavonoids                        | 112408-67-0               |
| 23  | 4-Methylumbelliferone glucuronide              | C <sub>16</sub> H <sub>16</sub> O <sub>9</sub>   | Coumarins and<br>derivatives      | 6160-80-1                 |
| 24  | Isovitexin<br>2"-(6"-p-coumaroylglucoside)     | C <sub>36</sub> H <sub>36</sub> O <sub>17</sub>  | Flavonoids                        | -                         |
| 25  | Neoeriocitrin                                  | C <sub>27</sub> H <sub>32</sub> O <sub>15</sub>  | Flavonoids                        | 13241-32-2                |
| 26  | Daidzein 4'-O-glucuronide                      | C <sub>21</sub> H <sub>18</sub> O <sub>10</sub>  | Flavonoids                        | -                         |
| 27  | Dihydroisorhamnetin                            | C <sub>16</sub> H <sub>14</sub> O <sub>7</sub>   | Flavonoids                        | 55812-91-4                |
| 28  | L-Epicatechol                                  | C <sub>15</sub> H <sub>14</sub> O <sub>6</sub>   | Flavonoids                        | 490-46-0                  |
| 29  | Kaempferol 3-O-arabinoside                     | C <sub>20</sub> H <sub>18</sub> O <sub>10</sub>  | Flavonoids                        | -                         |
| 30  | 2,4,6-Trihydroxybenzoic acid                   | C <sub>7</sub> H <sub>6</sub> O <sub>5</sub>     | Phenolic acids and<br>derivatives | 83-30-7                   |
| 31  | Pipecolic acid betaine                         | C <sub>21</sub> H <sub>20</sub> O <sub>10</sub>  | Flavonoids                        | 472-22-0                  |

|    |                                                                                                                                   |                                                 |                                   |                       |
|----|-----------------------------------------------------------------------------------------------------------------------------------|-------------------------------------------------|-----------------------------------|-----------------------|
| 32 | 3,7-Dimethylquercetin                                                                                                             | C <sub>17</sub> H <sub>14</sub> O <sub>7</sub>  | Flavonoids                        | 2068/2/2              |
| 33 | 2'-Hydroxygenistein                                                                                                               | C <sub>15</sub> H <sub>10</sub> O <sub>6</sub>  | Flavonoids                        | 1156-78-1             |
| 34 | 3-Galloylgallocatechin                                                                                                            | C <sub>22</sub> H <sub>18</sub> O <sub>11</sub> | Flavonoids                        | 5127-64-0             |
| 35 | 5,7,3'-Trihydroxy-4'-methoxyflavan<br>one                                                                                         | C <sub>16</sub> H <sub>14</sub> O <sub>6</sub>  | Flavonoids                        | 520-33-2              |
| 36 | Glyceollin III                                                                                                                    | C <sub>20</sub> H <sub>18</sub> O <sub>5</sub>  | Flavonoids                        | 61080-23-7            |
| 37 | Scolymoside                                                                                                                       | C <sub>27</sub> H <sub>30</sub> O <sub>15</sub> | Flavonoids                        | 25694-72-8            |
| 38 | Catechin 7-glucuronide                                                                                                            | C <sub>21</sub> H <sub>22</sub> O <sub>12</sub> | Flavonoids                        | 1146696-34-<br>5      |
| 39 | Maesopsin 6-glucoside                                                                                                             | C <sub>21</sub> H <sub>22</sub> O <sub>11</sub> | Flavonoids                        | -                     |
| 40 | Naringin                                                                                                                          | C <sub>27</sub> H <sub>32</sub> O <sub>14</sub> | Flavonoids                        | 10236-47-2            |
| 41 | Melitric acid B                                                                                                                   | C <sub>27</sub> H <sub>20</sub> O <sub>11</sub> | Phenolic acids and<br>derivatives | 153765-46-9           |
| 42 | Bergapten                                                                                                                         | C <sub>12</sub> H <sub>8</sub> O <sub>4</sub>   | Coumarins and<br>derivatives      | 484-20-8              |
| 43 | Tricetin                                                                                                                          | C <sub>15</sub> H <sub>10</sub> O <sub>7</sub>  | Flavonoids                        | 520-31-0              |
| 44 | 3'-Hydroxygenistein                                                                                                               | C <sub>15</sub> H <sub>10</sub> O <sub>6</sub>  | Flavonoids                        | -                     |
| 45 | Capillarisin                                                                                                                      | C <sub>16</sub> H <sub>12</sub> O <sub>7</sub>  | Coumarins and<br>derivatives      | 56365-38-9            |
| 46 | Quercetin 3-O-rhamnoside                                                                                                          | C <sub>21</sub> H <sub>20</sub> O <sub>11</sub> | Flavonoids                        | 522-12-3              |
| 47 | (-)-Epigallocatechin                                                                                                              | C <sub>15</sub> H <sub>14</sub> O <sub>7</sub>  | Flavonoids                        | 970-74-1              |
| 48 | Dattelic acid                                                                                                                     | C <sub>16</sub> H <sub>16</sub> O <sub>8</sub>  | Phenolic acids and<br>derivatives | 73263-62-4            |
| 49 | Medicocarpin                                                                                                                      | C <sub>22</sub> H <sub>24</sub> O <sub>9</sub>  | Flavonoids                        | 52766-70-8            |
| 50 | Kaempferol 3-xylosylglucoside                                                                                                     | C <sub>26</sub> H <sub>28</sub> O <sub>15</sub> | Flavonoids                        | 29322-07-4            |
| 51 | Hovenitin I                                                                                                                       | C <sub>16</sub> H <sub>14</sub> O <sub>8</sub>  | Flavonoids                        | 71106-82-6            |
| 52 | Alpha-(1,2-Dihydroxyethyl)-1,2,3,4-<br>tetrahydro-7-hydroxy-9-methoxy-3,4-<br>-dioxocyclopenta[c][1]benzopyran-6<br>-acetaldehyde | C <sub>17</sub> H <sub>16</sub> O <sub>8</sub>  | Coumarins and<br>derivatives      | -                     |
| 53 | Aflatoxin B1 diol                                                                                                                 | C <sub>17</sub> H <sub>14</sub> O <sub>8</sub>  | Coumarins and<br>derivatives      | 50668-79-6            |
| 54 | Epicatechin                                                                                                                       | C <sub>15</sub> H <sub>14</sub> O <sub>6</sub>  | Flavonoids                        | 490-46-0;154<br>-23-4 |
