# Supplementary material for: A Novel Strategy for Mixed Jam Evaluation: Apparent Indicator, Sensory, Metabolomic, and GC-IMS Analysis
Source: MDPI journal article supplement (doi:10.3390/foods13071104), 2024-04-03
Supplement: s1 [file s1]

**Table S4.** Odour descriptions of some volatile aroma components.

| NO. | Metabolite              | Flavor Profile                                                                                                                                                                                                     |
|-----|-------------------------|--------------------------------------------------------------------------------------------------------------------------------------------------------------------------------------------------------------------|
| 1   | Hexyl propionate        | Pear, green, fruity, musty, earthy and spicy.                                                                                                                                                                      |
| 2   | 1-Penten-3-one          | Strong pungent odour of spicy, etheric, peppery, garlic, mustard and onion.                                                                                                                                        |
| 3   | Tetrahydrolinalool      | Fresh Sweet Citrus Lime Floral Lily                                                                                                                                                                                |
| 4   | 1-Penten-3-ol           | ethereal horseradish green radish<br>chrysanthemum vegetable tropical fruity                                                                                                                                       |
| 5   | 2-Methylbutanal         | Smells like apples                                                                                                                                                                                                 |
| 6   | Butanal                 | Extremely diluted, it has an ethereal aroma.                                                                                                                                                                       |
| 7   | Pentanal                | Fermented Bread Flavour Fruity Flavour                                                                                                                                                                             |
| 8   | 1-Hydroxy-2-propanone   | Caramel aroma                                                                                                                                                                                                      |
| 9   | 1-Octanol               | It has a dry, sweet and sharp aroma of tallow and wax, with citrus, orange peel and rose-like notes, and a creamy base like anthesis root, which does not last long. It is also fruity, sweet and slightly grassy. |
| 10  | 1-Hexanol               | Aromas of young green leaves, with hints of wine, fruit and fat.                                                                                                                                                   |
| 11  | Phenylacetaldehyde      | Aroma similar to hyacinth, with sweet fruity notes when diluted.                                                                                                                                                   |
| 12  | Benzaldehyde            | Like almonds.                                                                                                                                                                                                      |
| 13  | Furfural                | Smells like almonds.                                                                                                                                                                                               |
| 14  | Decanal                 | Strong citrus peel odour                                                                                                                                                                                           |
| 15  | Nonanal                 | It has a strong greasy note, and when diluted it shows rose and citrus-like aromas.                                                                                                                                |
| 16  | Octanal                 | Strong fruity flavour                                                                                                                                                                                              |
| 17  | Heptanal                | Fresh, green, sweet herbaceous odour.                                                                                                                                                                              |
| 18  | Pentanal                | Fermented Bread Flavour Fruity Flavour                                                                                                                                                                             |
| 19  | Butanal                 | ethereal aldehydic chocolate peach fatty                                                                                                                                                                           |
| 20  | Dihydro-2(3H)-furanone  | Aromatic mint flavour.                                                                                                                                                                                             |
| 21  | 6-Methyl-5-hepten-2-one | Citrus, Fruity                                                                                                                                                                                                     |
| 22  | 4-Methyl-3-penten-2-one | Smells of mint or honey                                                                                                                                                                                            |
| 23  | 1-Octen-3-one           | Strong loamy, milled mushroom aroma and metallic notes.                                                                                                                                                            |
| 24  | 3-Carene                | Smells like turpentine.                                                                                                                                                                                            |
| 25  | 1-Methyl-1-butanol      | Misty miscellaneous alcohol Alcohol Fatty greasy alcoholic flavour Whisky Leather Cocoa                                                                                                                            |
| 26  | 1-Butanol               | Has a peculiar alcohol odour                                                                                                                                                                                       |
| 27  | Ethanol                 | Smells like wine.                                                                                                                                                                                                  |
| 28  | Methyl decanoate        | Oily Wine Fruity Floral                                                                                                                                                                                            |

|    |                                       |                                                                                                 |
|----|---------------------------------------|-------------------------------------------------------------------------------------------------|
| 29 | Ethyl acetate                         | oily wine fruity floral                                                                         |
| 30 | Ethyl decanoate                       | Fruity and winey aromas, pear and brandy-like notes.                                            |
| 31 | Ethyl nonanoate                       | Intense aroma of grapes, with rose, fruity and winey notes.                                     |
| 32 | Decanal                               | Strong aldehydic aroma, with sweet orange and tangerine aromas when diluted, with greasy notes. |
| 33 | Ethyl hexanoate                       | Has a pleasant odour                                                                            |
| 34 | Ethyl butanoate                       | Pineapple flavour                                                                               |
| 35 | 2-Heptanone                           | Has a fruity, pear-like flavour                                                                 |
| 36 | Acetone                               | Aromatic odour, highly volatile                                                                 |
| 37 | Acetoin                               | Has a pleasant creamy flavour                                                                   |
| 38 | 2,5-Dimethyl-4-methoxy-3(2H)-furanone | Bread Crust, Butter, Caramel, Floral, Fruit                                                     |
| 39 | Acetophenone                          | Almonds, Flower, Meat, Must                                                                     |
| 40 | 2-Pentylfuran                         | Butter, Floral, Fruit, Green Bean                                                               |
| 41 | Limonene                              | Citrus, Mint                                                                                    |
| 42 | alpha-Terpinene                       | Refreshing lemon citrus aroma                                                                   |
| 43 | alpha-Phellandrene                    | Aroma of black pepper and amygdala.                                                             |
| 44 | Myrcene                               | Has a special natural aroma, similar to that of bay leaves.                                     |
| 45 | (E,E)-2,4-Heptadienal                 | Possesses a special aromatic odour                                                              |
| 46 | 2-Methyl-2-butenal                    | Almond, mild butter aroma                                                                       |
| 47 | (E)-2-Hexenal                         | Intense fruity, green aroma, vegetable aroma                                                    |
| 48 | (E)-2-Pentenal                        | Pungent green, fruity                                                                           |
| 49 | 3-methylbutanal                       | Fruity, fatty, animal and almond flavours.                                                      |
| 50 | Propanal                              | Strong fruity flavour                                                                           |
| 51 | 1-Penten-3-ol                         | Strong grass-green odour                                                                        |
| 52 | Tetrahydrolinalool                    | fruity                                                                                          |
| 53 | Isoamyl acetate                       | Smells like bananas.                                                                            |
| 54 | alpha-Pinene                          | Turpentine odour                                                                                |

---
