# Supplementary material for: A Novel Strategy for Mixed Jam Evaluation: Apparent Indicator, Sensory, Metabolomic, and GC-IMS Analysis
Source: MDPI journal article supplement (doi:10.3390/foods13071104), 2024-04-03
Supplement: s1 [file s1]

**Table S2.** Differential polyphenol metabolites down-regulated in the comparison between day 0 and day 20 jam samples.

| NO. | Metabolite                                                                                                           | Formula                                         | Class I                        | CAS ID      |
|-----|----------------------------------------------------------------------------------------------------------------------|-------------------------------------------------|--------------------------------|-------------|
| 1   | Cubebinone                                                                                                           | C <sub>23</sub> H <sub>26</sub> O <sub>8</sub>  | Lignans and derivatives        | 101751-71-7 |
| 2   | Epigallocatechin gallate                                                                                             | C <sub>22</sub> H <sub>18</sub> O <sub>11</sub> | Flavonoids                     | 989-51-5    |
| 3   | Quercetin 3-glucoside 7-xyloside                                                                                     | C <sub>26</sub> H <sub>28</sub> O <sub>16</sub> | Flavonoids                     | 79592-61-3  |
| 4   | Feruloyl C1-glucuronide                                                                                              | C <sub>16</sub> H <sub>18</sub> O <sub>10</sub> | Phenolic acids and derivatives | -           |
| 5   | Limocitrin 3-rhamnoside                                                                                              | C <sub>23</sub> H <sub>24</sub> O <sub>12</sub> | Flavonoids                     | 90456-56-7  |
| 6   | Isovitexin 2''-O-glucoside                                                                                           | C <sub>27</sub> H <sub>30</sub> O <sub>15</sub> | Flavonoids                     | 60767-80-8  |
| 7   | Astilbin                                                                                                             | C <sub>21</sub> H <sub>22</sub> O <sub>11</sub> | Flavonoids                     | 29838-67-3  |
| 8   | Kuwanon Z                                                                                                            | C <sub>34</sub> H <sub>26</sub> O <sub>10</sub> | Flavonoids                     | 104931-21-7 |
| 9   | Luteoforol                                                                                                           | C <sub>15</sub> H <sub>14</sub> O <sub>6</sub>  | Flavonoids                     | 24897-98-1  |
| 10  | 2'-O-Methylisoliquiritigenin                                                                                         | C <sub>16</sub> H <sub>14</sub> O <sub>4</sub>  | Flavonoids                     | 112408-67-0 |
| 11  | Isovitexin<br>2''-(6'''-p-coumaroylglucoside)                                                                        | C <sub>36</sub> H <sub>36</sub> O <sub>17</sub> | Flavonoids                     | -           |
| 12  | Dihydroisorhamnetin                                                                                                  | C <sub>16</sub> H <sub>14</sub> O <sub>7</sub>  | Flavonoids                     | 55812-91-4  |
| 13  | 2,4,6-Trihydroxybenzoic acid                                                                                         | C <sub>7</sub> H <sub>6</sub> O <sub>5</sub>    | Phenolic acids and derivatives | 83-30-7     |
| 14  | Pipecolic acid betaine                                                                                               | C <sub>21</sub> H <sub>20</sub> O <sub>10</sub> | Flavonoids                     | 472-22-0    |
| 15  | Isorhamnetin<br>3-(6''-malonylglucoside)                                                                             | C <sub>25</sub> H <sub>24</sub> O <sub>15</sub> | Flavonoids                     | 86555-37-5  |
| 16  | 2'-Hydroxygenistein                                                                                                  | C <sub>15</sub> H <sub>10</sub> O <sub>6</sub>  | Flavonoids                     | 1156-78-1   |
| 17  | 3-Galloylallocatechin                                                                                                | C <sub>22</sub> H <sub>18</sub> O <sub>11</sub> | Flavonoids                     | 5127-64-0   |
| 18  | 5,7,3'-Trihydroxy-4'-methoxyflavone                                                                                  | C <sub>16</sub> H <sub>14</sub> O <sub>6</sub>  | Flavonoids                     | 520-33-2    |
| 19  | Glyceollin III                                                                                                       | C <sub>20</sub> H <sub>18</sub> O <sub>5</sub>  | Flavonoids                     | 61080-23-7  |
| 20  | Naringin                                                                                                             | C <sub>27</sub> H <sub>32</sub> O <sub>14</sub> | Flavonoids                     | 10236-47-2  |
| 21  | Tricetin                                                                                                             | C <sub>15</sub> H <sub>10</sub> O <sub>7</sub>  | Flavonoids                     | 520-31-0    |
| 22  | 3'-Hydroxygenistein                                                                                                  | C <sub>15</sub> H <sub>10</sub> O <sub>6</sub>  | Flavonoids                     | -           |
| 23  | Capillarisin                                                                                                         | C <sub>16</sub> H <sub>12</sub> O <sub>7</sub>  | Coumarins and derivatives      | 56365-38-9  |
| 24  | Quercetin 3-O-rhamnoside                                                                                             | C <sub>21</sub> H <sub>20</sub> O <sub>11</sub> | Flavonoids                     | 522-12-3    |
| 25  | (-)-Epigallocatechin                                                                                                 | C <sub>15</sub> H <sub>14</sub> O <sub>7</sub>  | Flavonoids                     | 970-74-1    |
| 26  | Medicocarpin                                                                                                         | C <sub>22</sub> H <sub>24</sub> O <sub>9</sub>  | Flavonoids                     | 52766-70-8  |
| 27  | Hovenitin I                                                                                                          | C <sub>16</sub> H <sub>14</sub> O <sub>8</sub>  | Flavonoids                     | 71106-82-6  |
| 28  | Alpha-(1,2-Dihydroxyethyl)-1,2,3,4-tetrahydro-7-hydroxy-9-methoxy-3,4-dioxocyclopenta[c][1]benzopyran-6-acetaldehyde | C <sub>17</sub> H <sub>16</sub> O <sub>8</sub>  | Coumarins and derivatives      | -           |
